# Supplementary material
Source: publisher figshare collection journal article supplement (https://rs.figshare.com/ndownloader/files/9787465)
Supplement: Supplementary file 1 [file 9787465]

## Sheet: Foglio1
ID_Pred	X	Y	Ranch	Prey	quantity	Day time
Pred_16	496312	5581274	Cordoba	sheep	1	Night
Pred_22	494263	5582246	Haure	sheep	1	Night
Pred_15	495188	5583579	Haure	sheep	1	Night
Pred_14	494638	5584069	Haure	sheep	3	Night
Pred_21	494252	5584410	Haure	Lamb	6	Night
Pred_11	495741	5585058	Haure	sheep	2	Night
Pred_10	481841	5585518	Rauch F.	sheep	1	Night
Pred_25	494814	5587751	Haure	sheep	1	Night
Pred_12	500044	5589215	Ilgner	calf	1	Night
Pred_23	482184	5595360	Mochas	calf	1	Night
Pred_29	486761	5595464	Mochas	calf	1	Night
Pred_30	486904	5592814	Las mochas	calf	1	Night
Pred_31	494510	5587126	Lauquen	sheep	7	Night
Pred_32	494510	5587126	Lauquen	Lambs	10	Night
Pred_33	493518	5586367	Haure	sheep	5	Night
